# Supplementary material for: Development of a CNS-permeable reactivator for nerve agent exposure: An iterative, multi-disciplinary approach
Source: Research Square preprint supplement (doi:10.21203/rs.3.rs-301687/v1), 2021-03-17
Supplement: Supplementary file 1 [file f305ceef96eb8a8c04195485.xlsx]

## Sheet: Sheet1
Supporting information
Development of a CNS-permeable Reactivator for Nerve Agent Exposure: An Iterative, Multi-Disciplinary Approach
		Brian J. Benniona, Michael ­A. Malfattia, Nicholas A. Bea, Heather A. Enrighta, Saphon Hokb,c, C. Linn Cadieuxd, Timothy S. Carpentera, Victoria Laoa, Edward A. Kuhna, M. Windy. McNerneya, Felice C. Lightstonea, Tuan H. Nguyene, Carlos A. Valdezb,c,*
S1 SMILES String Table			PAMPA Peff (cm/s)		Fraction reactivated (t = 30 min)
Compound name	SMILES string	Structure	mean	standard deviation	mean	standard deviation
1, LLNL-02	O=C(N[C@@H](C)CN1CC(C=CC=C2)=C2CCC1)/C([H])=N/O		3.73e-06	1.309e-06	0.104143	0.0339932
Diazepam	CN(C(C=CC(Cl)=C1)=C1C(C2=CC=CC=C2)=NC3)C3=ON(C(C=CC(Cl)=C1)=C1C(C2=CC=CC=C2)=NC3)C3=O		3.94e-06	1.09e-06	NA	NA
2-PAM	[H]/C(C1=[N+](C)C=CC=C1)=N\O		1.37e-08	1.67e-08	0.903472	0.234402
RS194B	O=C(/C([H])=N/O)NCCN1CCCCCC1		2.15e-07	8.88e-08	0.452042	0.122118
RS191E	O=C(/C([H])=N/O)NCCCN1CCCCC1		3.03e-07	1.49e-07	0.0447932	0.0125962
RS-157B	O=C(/C([H])=N/O)NCCN		1.05e-07	6.18e-08	0.0326534	0.0114877
RS69C	O=C(/C([H])=N/O)NCCN1CCOCC1		1.05e-07	7.15e-08	0.0356202	0.0255081
RS41A	O=C(/C([H])=N/O)NCCN1CCCC1		2.93e-07	1.57e-07	0.143604	0.0414979
RS41B	O=C(/C([H])=N/O)NCCN(C)C		1.01e-07	5.4e-08	0.0487738	0.00862385
7	O=C(OC(C)(C)C)NCCNC(/C([H])=N/O)=O		2.94e-07	1.02e-07	0.0536076	0.00742716
8	O=C(/C([H])=N/O)N[C@H]1CCN(C(OC(C)(C)C)=O)C1		1.57e-06	5.21e-07	0.0108239	0.0125452
9	O=C(/C([H])=N/O)NC1CN(C1)C(OC(C)(C)C)=O		1.24e-06	4.26e-07	0.0256212	0.0162493
10	O=C(/C([H])=N/O)NC1CN(C(OC(C)(C)C)=O)CCC1		3.18e-06	1.464e-06	0.0249585	0.012446
11	O=C(/C([H])=N/O)NCCCC		6.05e-06	3.49e-07	0.0565588	0.00701403
12	O=C(/C([H])=N/O)NC1CCCC1		3.95e-06	2.64e-06	-0.0066269	0.00896743
13	O=C(/C([H])=N/O)NCC1=CC=CC=C1		1.47e-06	8.03e-07	0.0104277	0.0142293
14	O=C(/C([H])=N/O)N1CCCN(C(/C([H])=N/O)=O)CC1		1.59e-07	5.05e-08	0.0568537	0.0172277
15	O=C(/C([H])=N/O)NC1CC1		1.39e-06	2.08e-07	0.0476501	0.0232911
16	O=C(/C([H])=N/O)NC1CCC1		2.86e-06	1.236e-06	0.0368173	0.00984653
17	O=C(N1CCC(NC(OC(C)(C)C)=O)C1)/C([H])=N/O		0*	0*	-0.0112225	0.0124343
18	O=C(/C([H])=N/O)N1CCN(CCC2=CC=CS2)CC1		4.38e-06	1.848e-06	-0.0178926	0.00600904
19	O=C(/C([H])=N/O)N1CCN(CC2=CC=C(Cl)C=C2)CC1		4.67e-06	9.99e-07	-0.00254377	0.00659972
20	O=C(/C([H])=N/O)N1CCN(CC2CCCC2)CC1		3.37e-06	5.96e-07	0.0022445	0.00777902
21	O=C(/C([H])=N/O)N1CCN(CC2=CC(Cl)=CC=C2)CC1		2.94e-06	2.851e-06	-0.008978	0.00592518
22	O=C(/C([H])=N/O)N1CCN(CC(C)C)CC1		1.88e-06	1.119e-06	0.00837947	0.00696291
23	O=C(NC(C)CN1CCCCCC1)/C([H])=N/O		1.92e-07	3.73e-08	0.232099	0.148065
24	O=C(NC(C)CN(C)C)/C([H])=N/O		0*	0*	0.0918743	0.0268928
25	O=C(NC(C)CN(CC)CC)/C([H])=N/O		1.96e-08	2.7e-08	0.0554008	0.0145974
26	O=C(NC(CC)CN1CCCC1)/C([H])=N/O		5.53e-08	1.53e-08	0.0237521	0.0108183
27	O=C(NC(C)CN1CCCCC1)/C([H])=N/O		1.58e-07	1.48e-07	0.0505074	0.0214236
28	O=C(NC(C)CN1CCC(C)CC1)/C([H])=N/O		3.19e-07	9.09e-08	0.0892122	0.0448037
29	O=C(N1CCN(C)CCC1)/C([H])=N/O		0*	0*	0.0362884	0.0178067
30	O=C(N1CCC(N2CCCCC2)CC1)/C([H])=N/O		0*	0*	0.008978	0.00604489
31	O=C(N1CCC(N(C)C)C1)/C([H])=N/O		0*	0*	0.0085291	0.00776365
35	O=C(N[C@@H](C)CN1CCC(C=CC=C2)=C2CC1)/C([H])=N/O		2.68e-06	8.21e-07	0.0323578	0.0377136
